# Supplementary material
Source: publisher figshare collection journal article supplement (https://tandf.figshare.com/ndownloader/files/9409069)
Supplement: Supplementary file 1 [file 9409069]

**Human dietary intake and hazard characterization for residues of neonicotinoides and organophosphorus pesticides in Egyptian honey**

Yahya Al Naggar1*, Garry Codling2, 3, John P. Giesy2, 4,5,6,7

1Department of Zoology, Faculty of Science, Tanta University 31527, Tanta, Egypt. Email: [Yehia.elnagar@science.tanta.edu.eg](mailto:Yehia.elnagar@science.tanta.edu.eg) Tel: +201016611092

2Toxicology Centre, University of Saskatchewan, 44 Campus Drive, Saskatoon, SK, S7N 5B3, Canada.

3Research Centre for Toxic Compounds in the Environment, Masaryk University, Pavillion 29, Brno, CZ 601 77, Czech Republic. Email: [garrycodling@yahoo.co.uk](mailto:garrycodling@yahoo.co.uk). Tel: +420 549 49 6552

4Department of Veterinary Biomedical Sciences, University of Saskatchewan, Saskatoon, Saskatchewan, Canada. Email: [jgiesy@aol.com](mailto:jgiesy@aol.com) Tel: +1306-966-2096

5Department of Zoology, and Center for Integrative Toxicology, Michigan State University, East Lansing, MI, USA

6School of Biological Sciences, University of Hong Kong, Hong Kong, SAR, China

7State Key Laboratory of Pollution Control and Resource Reuse, School of the Environment, Nanjing University, Nanjing, People’s Republic of China.

***Corresponding Author:**

Yahya Al Naggar, PhD

Zoology Department, Faculty of Science

Tanta University31527, Tanta, Egypt

Email: [Yehia.elnagar@science.tanta.edu.eg](mailto:Yehia.elnagar@science.tanta.edu.eg)

Tel: +201016611092

**Table S1.** Concentrations of untransformed, active ingredient, neonicotinoids (NIs) in honey reported previously in comparison to the present study.

| **NIs** | **Mean Concentration**  **(µg kg-1, wm) in honey** | **References** |
| --- | --- | --- |
| Acetamiprid | ND | Mullin et al. (2010) |
| ND | Codling et al. (2016) |
| 5.7- 4 | (Spring- Summer) present study |
| Clothanidin | ND | Codling et al. (2016) |
| 0.9a | Cutler and Scott-Dupree (2007) |
| ND | present study |
| Imidacloprid | 2a | Kamel (2010) |
| 32.1 | Codling et al. (2016) |
| (0.5-1.1) | (Spring- Summer) present study |
| Thicloprid | 33a | Frazier et al. (2008) |
| 3.6 | Codling et al. 2016) |
| ND | present study |
| Thiamethoxam | ND | Mullin et al. (2010) |
| 75 | Codling et al. (2016) |
| 18.8-ND | (Spring- Summer) present study |
| **Imidaclopid metabolites** | | |
| Olefin | 46.4 | Codling et al. (2016) |
| 0.9-ND | (Spring- Summer) present study |
| 5-hydroxy | 71.4 | Codling et al. (2016) |
| 0.7-0.4 | (Spring- Summer) present study |
| urea | 7.1 | Codling et al. (2016) |
| ND | present study |
| desnitro olefin | ND-0.5 | (Spring- Summer) present study |
| desnitro HCL | 3.6 | Codling et al. (2016) |
| ND | present study |
| 6-chlornicotinic acid | ND | Codling et al. (2016) |
| 0.6-ND | (Spring- Summer) present study |
| Dinotefuran | 0.6-0.6 | (Spring- Summer) present study |
| Di-Urea | 0.4-0.45 | (Spring- Summer) present study |
| Di-DN-Phos | 0.9-0.9 | (Spring- Summer) present study |

a These are the upper concentrations.

| **Pesticides** | **Concentration of OPs**  **in Honey (** **µg kg-1** **, wm)** | **References** |
| --- | --- | --- |
|
| **Diazinon** | ND | Rissato et al. (2007) |
| 35 | Johnson et al. (2010) |
| 14 | Wiest et al. ( 2011) |
| 67.3 | Eissa et al. (2014) |
| 0.3 | Al Naggar et al. (2015b) |
| (ND-0.3 ) | (Spring-Summer) )Present study) |
| **Malathion** | 0.24 | Rissato et al. (2007( |
| 243 | Johnson et al. (2010) |
| ND | Chuazat et al. ( 2011) |
| 14 | Eissa et al. (2014) |
| ND | ( present study) |
| **Dimethoate** | 9 | Johnson et al. (2010) |
| ND | Wiest et al. (2011) |
| 1.5 | Al Naggar et al. (2015b) |
| ( 3.36-ND ) | (Spring-Summer) )Present study) |
| **Coumaphos** | 2020 | Mullin et al. (2010) |
| 29 | Wiest et al. (2011) |
| 934 | Chuazat et al. ( 2011) |
| 60 | Pareja et al. ( 2011) |
| ND | ( present study) |
| **Phorate** | 0.9 | Johnson et al. (2010) |
| ND | (present study) |
| **Dichlorvos** | ND | Rissato et al. (2007) |
| 8 | Johnson et al. (2010) |
| ND | Wiest et al .(2011) |
| ( 1.9-ND ) | (Spring-Summer) |
| **Profenofos** | ND | Rissato et al. (2007( |
| 166 | Eissa et al. (2014) |
| ( ND-0.23 ) | )Spring-Summer( |
| **Chlorpyrifos** | 0.01 | Rissato et al. ( 2007) |
| 15 | Johnson et al. (2010) |
| 80 | Pareja et al. (2011) |
| ND | Wiest et al.(2011( |
| 10 | Eissa et al. (2014) |
| ( ND-3.3 | (Spring-Summer( |
| **Ch. Methyl** | 0.2 | Johnson et al. (2010) |
| ND | ( present study) |
| **Fenthion** | ND | (Rissato et al. (2007) |
| ND | (present study) |

**Table S 2.** Concentrations of organophosphorus pesticides (OPs) in honey reported previously in comparison to the present study.
